# Supplementary material for: Sleep quality and depressive symptoms: insights from a genetically informative design
Source: Research Square preprint supplement (doi:10.21203/rs.3.rs-8480411/v1), 2026-01-24
Supplement: Supplementary file 1 [file e8cb0b975041d5281c386122.docx]

**SUPPLEMENTARY INFORMATION**

**Supplementary methods**

Genetic and environmental factor scores were calculated using an independent pathway model. The independent pathway model, when applied to genetically informative designs, is a type of multivariate model in which the relationship between a set of variables is controlled by genetic and environmental common latent factors. The independent pathway model used in this study (Supplementary Figure 1) enabled us to directly estimate common genetic and environmental factors influencing the observed variables (i.e., the sub-scales of the Pittsburgh Sleep Quality Index) (1). We used this approach to calculate individual factor scores for sleep quality (both genetic, SQ-A, and environmental, SQ-E). This is a two-step procedure. First, the model parameters (e.g., factor loadings and unique variances) were estimated using an independent pathway model. These estimates were then used to obtain individual scores for each participant (i.e., SQ-A and SQ-E) (2). The correlation between the sum of SQ-E and SQ-A and the PSQI total score is displayed in Supplementary Figure 2 (r=0.98). These factor scores were then used as a standard variable replacing sleep quality. Supplementary Table 1 shows the regression models including the environmental factor scores, while Supplementary Table 2 displays the models including the genetic factor scores.

Supplementary Figure 1: Independent pathway model used to estimate common genetic and environmental factors influencing the sub-scales of the Pittsburgh Sleep Quality Index


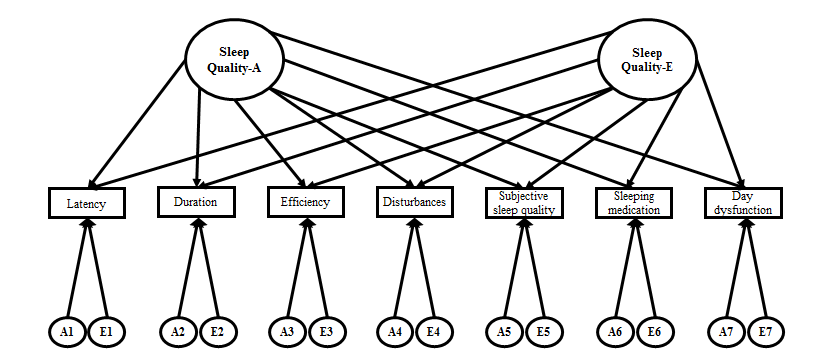


Supplementary Figure 2: Correlation between the sum of SQ-E and SQ-A and the PSQI total score


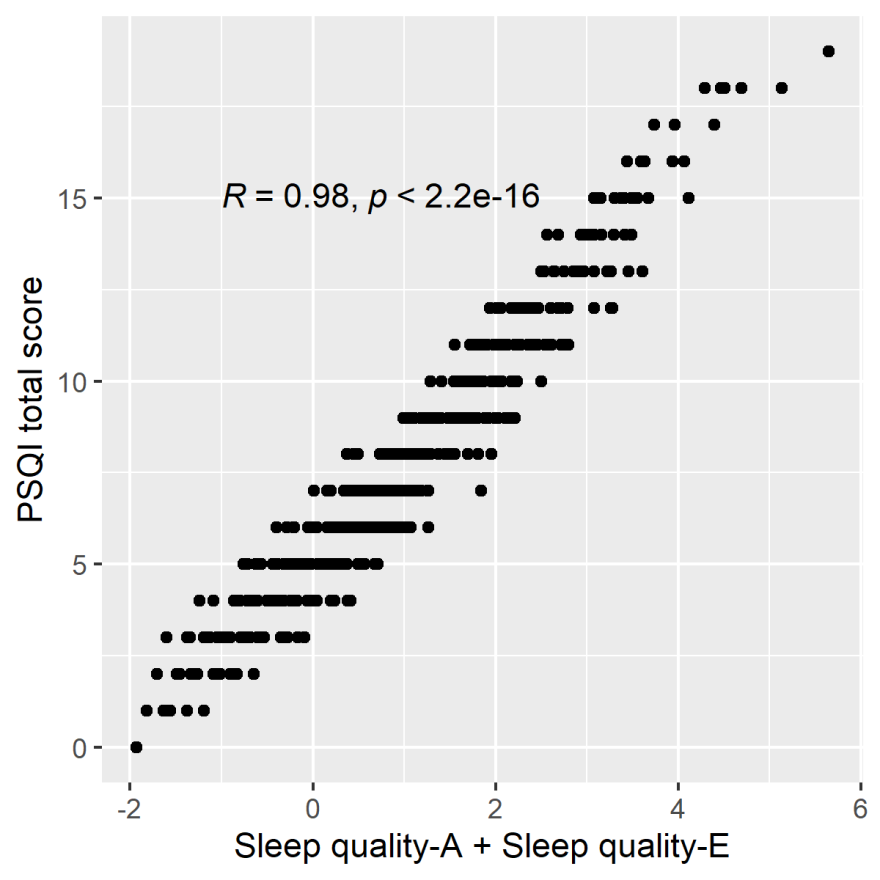


Supplementary Table 1: Regression models for depressive symptomatology (PHQ-7 score)

| Model (model for comparison) |  | Estimate | SE | t-value | Standardized estimate | AIC | R2 explained by fixed effects | Model comparison (p-value) |
| --- | --- | --- | --- | --- | --- | --- | --- | --- |
| **I** |  |  |  |  |  | **5569.5** | **0.332** |  |
|  | Sleep quality | 0.492 | 0.028 | 17.88 | 0.536 |  |  |  |
|  | PGS DEP | 0.228 | 0.114 | 2.005 | 0.064 |  |  |  |
|  | Sex | -0.821 | 0.192 | -4.266 | -0.109 |  |  |  |
|  | Age | -0.203 | 0.170 | -1.196 | -0.434 |  |  |  |
|  | Age2 | 1.267 | 1.292 | 0.981 | 0.356 |  |  |  |
|  | Sleep quality* PGS DEP | 0.080 | 0.025 | 3.257 | 0.083 |  |  |  |
|  | Sex* PGS DEP | -0.002 | 0.189 | -0.013 | -0.001 |  |  |  |
|  | Sex* Sleep quality | -0.089 | 0.051 | -1.709 | -0.051 |  |  |  |
|  | Age* PGS DEP | -0.056 | 0.168 | -0.335 | -0.124 |  |  |  |
|  | Age* Sleep quality | -0.055 | 0.042 | -1.291 | -0.476 |  |  |  |
|  | Age2* PGS DEP | 0.599 | 1.275 | 0.470 | 0.174 |  |  |  |
|  | Age2* Sleep quality | 0.356 | 0.319 | 1.115 | 0.411 |  |  |  |
| II (I) |  |  |  |  |  | 5560.9 | 0.326 | 0.001 |
|  | Sleep quality | 0.499 | 0.028 | 18.101 | 0.544 |  |  |  |
|  | PGS DEP | 0.280 | 0.114 | 2.465 | 0.078 |  |  |  |
|  | Sex | -0.807 | 0.193 | -4.178 | -0.107 |  |  |  |
|  | Age | -0.217 | 0.170 | -1.276 | -0.464 |  |  |  |
|  | Age2 | 1.388 | 1.296 | 1.071 | 0.390 |  |  |  |
|  | Sex* PGS DEP | -0.150 | 0.184 | -0.816 | -0.026 |  |  |  |
|  | Sex* Sleep quality | -0.089 | 0.052 | -1.725 | -0.052 |  |  |  |
|  | Age* PGS DEP | -0.022 | 0.168 | -0.128 | -0.048 |  |  |  |
|  | Age* Sleep quality | -0.056 | 0.043 | -1.327 | -0.491 |  |  |  |
|  | Age2* PGS DEP | 0.315 | 1.128 | 0.247 | 0.092 |  |  |  |
|  | Age2* Sleep quality | 0.373 | 0.321 | 1.163 | 0.431 |  |  |  |
| III (I) |  |  |  |  |  | 5574.0 | 0.320 | <0.001 |
|  | Sleep quality | 0.485 | 0.023 | 21.041 | 0.529 |  |  |  |
|  | PGS DEP | 0.216 | 0.090 | 2.397 | 0.060 |  |  |  |
|  | Age | -0.229 | 0.171 | -1.337 | -0.491 |  |  |  |
|  | Age2 | 1.492 | 1.307 | 1.142 | 0.419 |  |  |  |
|  | Sleep quality* PGS DEP | 0.079 | 0.024 | 3.287 | 0.082 |  |  |  |
|  | Age* PGS DEP | -0.071 | 0.169 | -0.416 | -0.155 |  |  |  |
|  | Age* Sleep quality | -0.056 | 0.043 | -1.304 | -0.484 |  |  |  |
|  | Age2* PGS DEP | 0.706 | 1.285 | 0.550 | 0.206 |  |  |  |
|  | Age2* Sleep quality | 0.371 | 0.322 | 1.155 | 0.429 |  |  |  |
| IV (I) |  |  |  |  |  | 5569.8 | 0.319 | 0.002 |
|  | Sleep quality | 0.497 | 0.028 | 17.99 | 0.542 |  |  |  |
|  | PGS DEP | 0.238 | 0.115 | 2.069 | 0.066 |  |  |  |
|  | Sex | -0.771 | 0.194 | -3.972 | -0.102 |  |  |  |
|  | Sleep quality* PGS DEP | 0.072 | 0.025 | 2.915 | 0.075 |  |  |  |
|  | Sex * PGS DEP | -0.013 | 0.191 | -0.070 | -0.002 |  |  |  |
|  | Sex * Sleep quality | -0.075 | 0.052 | -1.455 | -0.044 |  |  |  |
| V (I) |  |  |  |  |  | 5580.2 | 0.309 | <0.001 |
|  | Sleep quality | 0.492 | 0.023 | 21.272 | 0.537 |  |  |  |
|  | PGS DEP | 0.225 | 0.091 | 2.480 | 0.063 |  |  |  |
|  | Sleep quality* PGS DEP | 0.072 | 0.024 | 2.984 | 0.075 |  |  |  |
| VI (V) |  |  |  |  |  | 5587.1 | 0.303 | 0.003 |
|  | Sleep quality | 0.498 | 0.023 | 21.487 | 0.543 |  |  |  |
|  | PGS DEP | 0.203 | 0.091 | 2.418 | 0.062 |  |  |  |
| VII (VI) |  |  |  |  |  | 5672.2 | 0.299 | 0.016 |
|  | Sleep quality | 0.501 | 0.023 | 21.671 | 0.547 |  |  |  |
| VIII (VI) |  |  |  |  |  | 6172.0 | 0.010 | <0.001 |
|  | PGS DEP | 0.371 | 0.107 | 3.457 | 0.104 |  |  |  |

Note: higher scores represent poorer sleep quality or a higher genetic predisposition. PGS: polygenic scores

Model I: Symptoms of depression predicted by sleep quality, PGS DEP, sex, age, sleep quality* PGS DEP, sex* PGS DEP, sex* Sleep quality, age* PGS DEP, and age* sleep quality.

Model II: Symptoms of depression predicted by sleep quality, PGS DEP, sex, age, sex* PGS DEP, sex* Sleep quality, age* PGS DEP, and age* sleep quality.

Model III: Symptoms of depression predicted by sleep quality, PGS DEP, age, sleep quality* PGS DEP, age* PGS DEP, and age* sleep quality.

Model IV: Symptoms of depression predicted by sleep quality, PGS DEP, sex, sleep quality* PGS DEP, sex* PGS DEP, and sex* sleep quality.

Model V: Symptoms of depression predicted by sleep quality, PGS DEP, and sleep quality* PGS DEP.

Model VI: Symptoms of depression predicted by sleep quality, and PGS DEP.

Model VII: Symptoms of depression predicted by sleep quality.

Model VIII: Symptoms of depression predicted by PGS DEP.

AIC: Akaike Information Criterion; PGS DEP: Polygenic score for depression; SE: standard error.

Model in bold represents the model with the lowest AIC value, selected as the best fit.

Supplementary Table 2: Regression models for depressive symptomatology (PHQ-8 score) including environmental factor scores for sleep quality.

| Model (model for comparison) |  | Estimate | SE | t-value | Standardized estimate | AIC | R2 explained by fixed effects | Model comparison (p-value) |
| --- | --- | --- | --- | --- | --- | --- | --- | --- |
| **I** |  |  |  |  |  | **5901.4** | **0.310** |  |
|  | Sleep quality-E | 2.278 | 0.132 | 17.261 | 0.522 |  |  |  |
|  | PGS DEP | 0.321 | 0.132 | 2.426 | 0.078 |  |  |  |
|  | Sex | -1.468 | 0.220 | -6.649 | -0.169 |  |  |  |
|  | Age | -0.214 | 0.198 | -1.079 | -0.399 |  |  |  |
|  | Age2 | 1.373 | 1.510 | 0.909 | 0.336 |  |  |  |
|  | Sleep quality-E* PGS DEP | 0.231 | 0.120 | 1.926 | 0.050 |  |  |  |
|  | Sex* PGS DEP | -0.150 | 0.217 | -0.691 | -0.022 |  |  |  |
|  | Sex* Sleep quality-E | -0.668 | 0.243 | -2.746 | -0.083 |  |  |  |
|  | Age* PGS DEP | -0.131 | 0.196 | -0.665 | -0.251 |  |  |  |
|  | Age* Sleep quality-E | -0.299 | 0.206 | -1.454 | -0.532 |  |  |  |
|  | Age2* PGS DEP | -1.226 | 1.489 | 0.823 | 0.319 |  |  |  |
|  | Age2* Sleep quality-E | 2.116 | 1.556 | 1.360 | 0.498 |  |  |  |
| II (I) |  |  |  |  |  | 5903.1 | 0.308 | 0.05 |
|  | Sleep quality-E | 2.302 | 0.132 | 17.490 | 0.527 |  |  |  |
|  | PGS DEP | 0.340 | 0.132 | 2.572 | 0.082 |  |  |  |
|  | Sex | -1.450 | 0.220 | -6.572 | -0.168 |  |  |  |
|  | Age | -0.220 | 0.199 | -1.108 | -0.410 |  |  |  |
|  | Age2 | 1.425 | 1.512 | 0.942 | 0.349 |  |  |  |
|  | Sex* PGS DEP | -0.213 | 0.215 | -0.994 | -0.032 |  |  |  |
|  | Sex* Sleep quality-E | -0.656 | 0.244 | -2.691 | -0.082 |  |  |  |
|  | Age* PGS DEP | -0.102 | 0.196 | -0.521 | -0.196 |  |  |  |
|  | Age* Sleep quality-E | -0.315 | 0.206 | -1.531 | -0.560 |  |  |  |
|  | Age2* PGS DEP | 0.993 | 1.486 | 0.668 | 0.252 |  |  |  |
|  | Age2* Sleep quality-E | 2.245 | 1.557 | 1.442 | 0.528 |  |  |  |

Note: higher scores represent poorer sleep quality or a higher genetic predisposition. PGS: polygenic scores

Model I: Symptoms of depression predicted by sleep quality-E, PGS DEP, sex, age, sleep quality-E* PGS DEP, sex* PGS DEP, sex* Sleep quality-E, age* PGS DEP and age* sleep quality-E.

Model II: Symptoms of depression predicted by sleep quality-E, PGS DEP, sex, age, sex* PGS DEP, sex* Sleep quality-E, age* PGS DEP and age* sleep quality-E.

AIC: Akaike Information Criterion; PGS DEP: Polygenic score for depression; SE: standard error; sleep quality-E: environmental factor scores for sleep quality.

Model in bold represents the model with the lowest AIC value, selected as the best fit.

Supplementary Table 3: Regression models for depressive symptomatology (PHQ-8 score) including genetic factor scores for sleep quality.

| Model (model for comparison) |  | Estimate | SE | t-value | Standardized estimate | AIC | R2 explained by fixed effects | Model comparison (p-value) |
| --- | --- | --- | --- | --- | --- | --- | --- | --- |
| **I** |  |  |  |  |  | **5819.7** | **0.359** |  |
|  | Sleep quality-A | 2.979 | 0.154 | 19.343 | 0.574 |  |  |  |
|  | PGS DEP | 0.245 | 0.130 | 1.883 | 0.059 |  |  |  |
|  | Sex | -0.941 | 0.219 | -4.292 | -0.109 |  |  |  |
|  | Age | -0.070 | 0.192 | -0.362 | -0.130 |  |  |  |
|  | Age2 | 0.199 | 1.466 | 0.136 | 0.049 |  |  |  |
|  | Sleep quality-A* PGS DEP | 0.428 | 0.132 | 3.237 | 0.082 |  |  |  |
|  | Sex* PGS DEP | 0.092 | 0.214 | 0.432 | 0.014 |  |  |  |
|  | Sex* Sleep quality-A | -0.577 | 0.287 | -2.012 | -0.061 |  |  |  |
|  | Age* PGS DEP | 0.054 | 0.190 | 0.283 | 0.104 |  |  |  |
|  | Age* Sleep quality-A | -0.412 | 0.237 | -1.740 | -0.623 |  |  |  |
|  | Age2* PGS DEP | -0.272 | 1.443 | -0.188 | -0.069 |  |  |  |
|  | Age2* Sleep quality-A | 2.886 | 1.798 | 1.606 | 0.576 |  |  |  |
| II (I) |  |  |  |  |  | 5828.1 | 0.353 | 0.001 |
|  | Sleep quality-A | 2.959 | 0.155 | 19.131 | 0.570 |  |  |  |
|  | PGS DEP | 0.314 | 0.129 | 2.441 | 0.076 |  |  |  |
|  | Sex | -0.941 | 0.220 | -4.271 | -0.109 |  |  |  |
|  | Age | -0.093 | 0.193 | -0.486 | -0.174 |  |  |  |
|  | Age2 | 0.404 | 1.471 | 0.275 | 0.099 |  |  |  |
|  | Sex* PGS DEP | -0.088 | 0.208 | 0.424 | -0.013 |  |  |  |
|  | Sex* Sleep quality-A | -0.508 | 0.287 | -1.767 | -0.053 |  |  |  |
|  | Age* PGS DEP | 0.061 | 0.191 | 0.320 | 0.118 |  |  |  |
|  | Age* Sleep quality-A | -0.473 | 0.237 | -1.994 | -0.716 |  |  |  |
|  | Age2* PGS DEP | -0.341 | 1.450 | -0.235 | -0.086 |  |  |  |
|  | Age2* Sleep quality-A | 3.386 | 1.800 | 1.882 | 0.676 |  |  |  |

Note: higher scores represent poorer sleep quality or a higher genetic predisposition. PGS: polygenic scores

Model I: Symptoms of depression predicted by sleep quality-A, PGS DEP, sex, age, sleep quality-A* PGS DEP, sex* PGS DEP, sex* Sleep quality-A, age* PGS DEP and age* sleep quality-A.

Model II: Symptoms of depression predicted by sleep quality-A, PGS DEP, sex, age, sex* PGS DEP, sex* Sleep quality-A, age* PGS DEP and age* sleep quality-A.

AIC: Akaike Information Criterion; PGS DEP: Polygenic score for depression; SE: standard error; sleep quality-A: genetic factor scores for sleep quality.

Model in bold represents the model with the lowest AIC value, selected as the best fit.

**References**

1. Rijsdijk F. Independent Pathway Model. In: Everitt B, Howell D, editors. Encyclopedia of Statistics in Behavioral  Science. Chichester, UK: John Wiley & Sons 2005. p. 913-4.

2. Boomsma DI, Molenaar PC, Orlebeke JF. Estimation of individual genetic and environmental factor scores. Genet Epidemiol. 1990;7(1):83-91.
